# Supplementary material for: Silver cluster-promoted heterogeneous copper catalyst for N-alkylation of amines with alcohols
Source: Royal Society of Chemistry journal article supplement (doi:10.1039/c1ra00560j), 2011-01-01
Supplement: c1ra00560j.pdf [file c1ra00560j.pdf]

## Supporting Information

Kenichi Shimizu,<sup>\*a</sup> Katsuya Shimura,<sup>a</sup> Masanari Nishimura,<sup>b</sup> and Atsushi Satsuma<sup>b</sup>

<sup>a</sup> Catalysis Research Center, Hokkaido University, N-21, W-10, Sapporo 001-0021, Japan

<sup>b</sup> Department of Molecular Design and Engineering, Graduate School of Engineering, Nagoya University, Nagoya 464-8603, Japan

\*Corresponding author: e-mail: [kshimizu@cat.hokudai.ac.jp](mailto:kshimizu@cat.hokudai.ac.jp), Fax: +81-11-706-9163

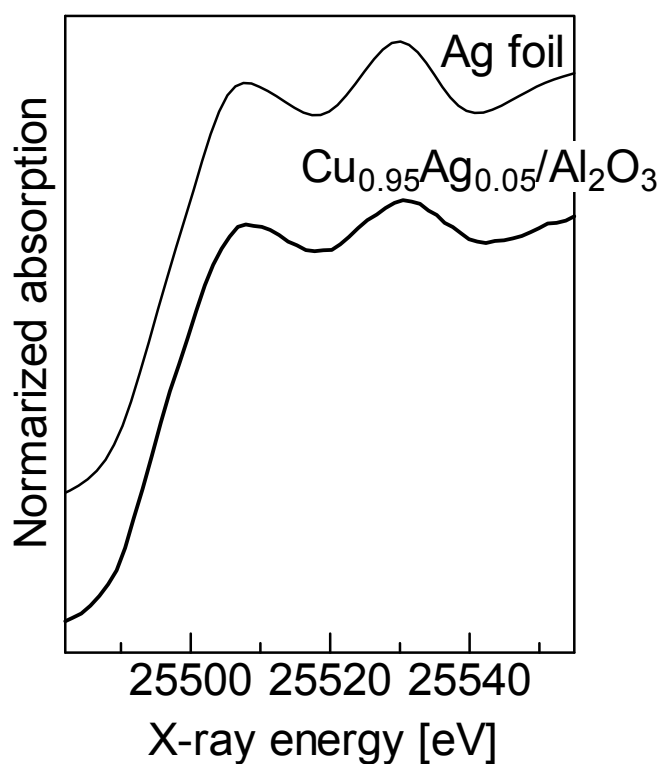

Fig. S1 Ag K-edge XANES spectra.

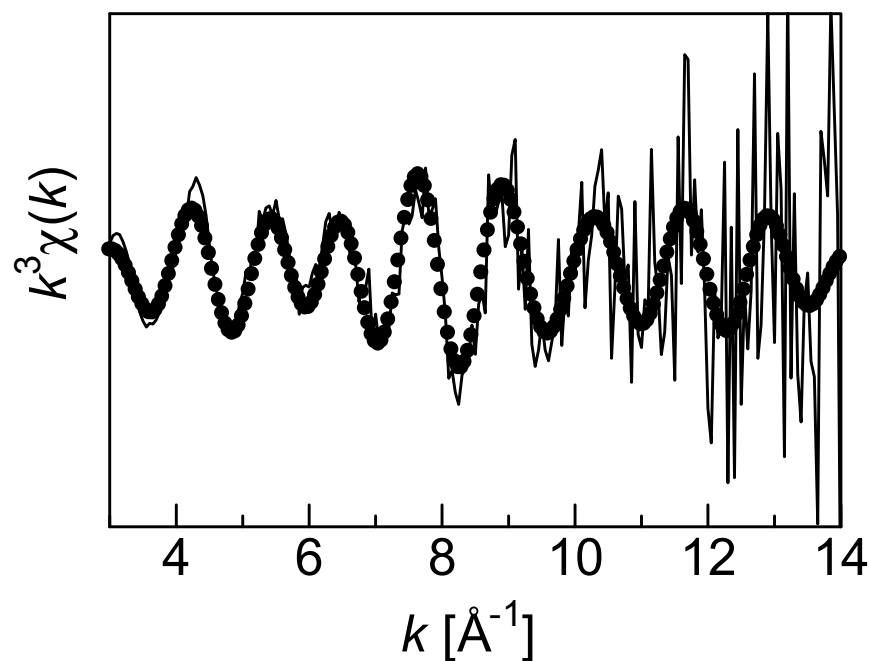

Fig. S2 The inverse Fourier transform of  $k^3$ -weighted Ag K-edge EXAFS spectrum of (solid line)  $\text{Cu}_{0.95}\text{Ag}_{0.05}/\text{Al}_2\text{O}_3$  (Cu+Ag= 10 wt%) and (•) its best fit derived from curve-fitting analysis.

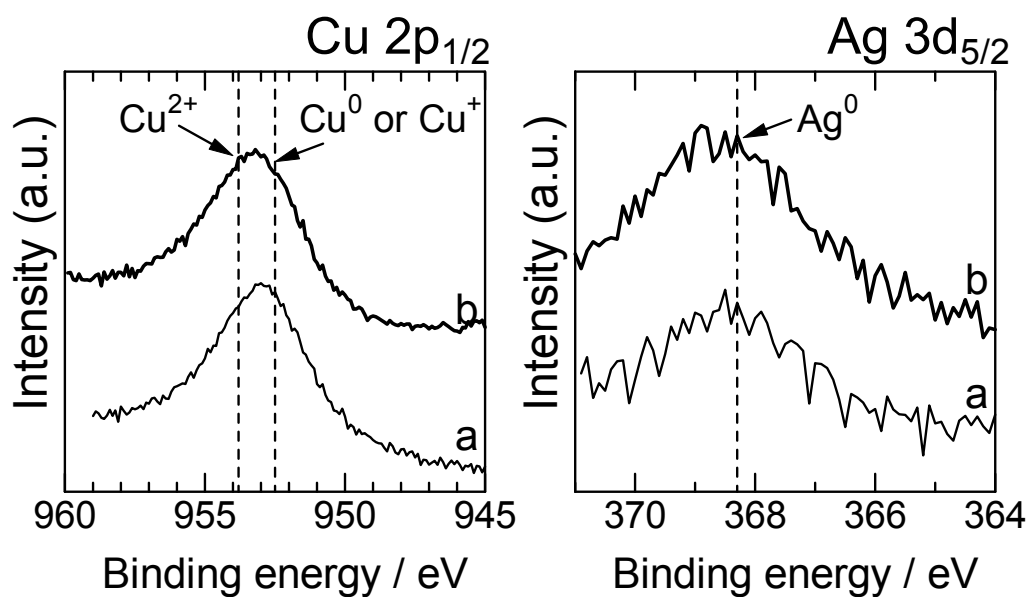

Fig. S3 XPS spectra in the  $\text{Cu}2p_{1/2}$  and  $\text{Ag}3d_{5/2}$  regions for  $\text{Cu}_{0.95}\text{Ag}_{0.05}/\text{Al}_2\text{O}_3$  (Cu+Ag= 10 wt%) (a) after  $\text{H}_2$ -reduction and (b) after its use in the reaction of **1** and **2**.

**<sup>1</sup>H-NMR and GC/MS Analysis:** <sup>1</sup>H-NMR spectra were recorded in CDCl<sub>3</sub> with TMS as an internal standard at ambient temperature on a Varian INOVA-500 operating at 500 MHz.

**Benzyl-*m*-tolyl-amine**

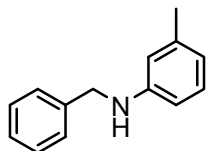

<sup>1</sup>H NMR ( CDCl<sub>3</sub>): δ 7.43 – 7.32 (m, 5H, aromatic) , δ 7.11 (t, J=7.6Hz, 1H, aromatic) , δ 6.59 (d, J=7.9Hz, 1H, aromatic) , δ 6.51 (s, 1H, aromatic) , δ 6.49 (d, J=8.4Hz, 1H, aromatic) , δ 4.36 (s, 2H, CH<sub>2</sub>) , δ 3.98 (br, 1H, NH) ,δ 2.32 (s, 3H, CH<sub>3</sub>).

MS: *m/z* (relative intensity) 197 (M<sup>+</sup>,51), 91 (100).

**Benzyl-*p*-tolyl-amine**

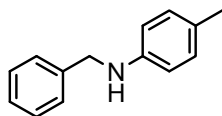

<sup>1</sup>H NMR ( CDCl<sub>3</sub>): δ 7.37 – 7.21 (m, 5H, aromatic) , δ 6.97 (d, J=8.4Hz, 2H, aromatic) , δ 6.56 (d, J=8.4Hz, 2H, aromatic) , δ 4.31 (s, 2H, CH<sub>2</sub>) , δ 3.90 (br, 1H, NH) , δ 2.23 (s, 3H, CH<sub>3</sub>).

MS: *m/z* (relative intensity) 197 (M<sup>+</sup>,46), 91 (100).

***N*-Benzyl-4-methoxyaniline**

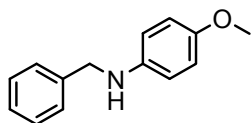

<sup>1</sup>H NMR ( CDCl<sub>3</sub>): δ 7.36 – 7.20 (m, 5H, aromatic) , δ 6.76 (d, J=9Hz, 2H, aromatic) , δ 6.57 (d, J=9Hz, 2H, aromatic) , δ 4.25 (s, 2H, CH<sub>2</sub>) , δ 3.71 (s, 3H, OCH<sub>3</sub>) , δ 3.58 (br, 1H, NH).

MS: *m/z* (relative intensity) 212 (M<sup>+</sup>,10), 213 (100).

**Dibenzylamine**

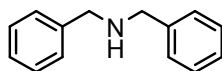

<sup>1</sup>H NMR ( CDCl<sub>3</sub>): δ 7.40 – 7.18 (m, 10H, aromatic) , δ 3.79 (s, 4H, CH<sub>2</sub>) , δ 1.76 (br, 1H, NH).

MS: *m/z* (relative intensity) 196 (M<sup>+</sup>,10), 91 (100)

### ***N*-Benzyl-*N*-methylaniline**

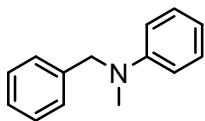

$^1\text{H NMR}$  (  $\text{CDCl}_3$  ):  $\delta$  7.31 – 7.15 (m, 7H, aromatic) ,  $\delta$  6.73 – 6.65 (m, 3H, aromatic) ,  $\delta$  4.48 (s, 2H,  $\text{CH}_2$ ) ,  $\delta$  3.03 (s, 3H,  $\text{CH}_3$ ).

MS:  $m/z$  (relative intensity) .

### ***N*-Octylbenzylamine**

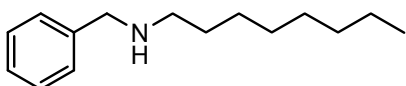

$^1\text{H NMR}$  (  $\text{CDCl}_3$  ):  $\delta$  7.28 – 7.19 (m, 5H, aromatic) ,  $\delta$  3.50 (s, 2H,  $\text{CH}_2$ ) ,  $\delta$  2.34 (t,  $J=7\text{Hz}$ , 4H,  $\text{CH}_2$ ) ,  $\delta$  1.40 – 1.35 (m, 4H,  $\text{CH}_2$ ) ,  $\delta$  1.24 – 1.20 (m, 4H,  $\text{CH}_2$ ) ,  $\delta$  0.82 (t,  $J=7\text{Hz}$ , 4H,  $\text{CH}_3$ ).

MS:  $m/z$  (relative intensity) 219 ( $\text{M}^+$ ,2), 91 (100).

### ***N,N*-Dibutylbenzylamine**

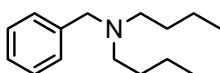

$^1\text{H NMR}$  (  $\text{CDCl}_3$  ):  $\delta$  7.28 – 7.19 (m, 5H, aromatic) ,  $\delta$  3.50 (s, 2H,  $\text{CH}_2$ ) ,  $\delta$  2.34 (t,  $J=7\text{Hz}$ , 4H,  $\text{CH}_2$ ) ,  $\delta$  1.40 – 1.35 (m, 4H,  $\text{CH}_2$ ) ,  $\delta$  1.24 – 1.20 (m, 4H,  $\text{CH}_2$ ) ,  $\delta$  0.82 (t,  $J=7\text{Hz}$ , 4H,  $\text{CH}_3$ ).

MS:  $m/z$  (relative intensity) 219 ( $\text{M}^+$ ,2), 91 (100).

### ***N*-Phenylethylaniline**

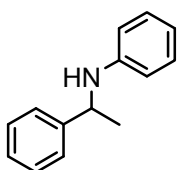

$^1\text{H NMR}$  (  $\text{CDCl}_3$  ):  $\delta$  7.36 – 7.12 (m, 7H, aromatic) ,  $\delta$  6.74-6.62 (m, 3H, aromatic) ,  $\delta$

4.50-4.48 (m, 1H, CH) ,  $\delta$  4.02 (br, 1H, NH) ,  $\delta$  1.51 (d, J=7.0Hz, 3H, CH<sub>3</sub>).

MS: *m/z* (relative intensity) 197 (M<sup>+</sup>,75), 182 (100).

### ***N*-Phenethylamine**

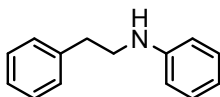

<sup>1</sup>H NMR ( CDCl<sub>3</sub> ):  $\delta$  7.30 – 7.10 (m, 7H, aromatic) ,  $\delta$  6.67 (t, J=7Hz, 1H, aromatic) ,  $\delta$  6.55 (d, J=8Hz, 2H, aromatic) ,  $\delta$  3.58 (br, 1H, NH) ,  $\delta$  3.32 (t, J=7Hz, 2H, CH<sub>2</sub>) ,  $\delta$  2.83 (t, J=7Hz, 2H, CH<sub>2</sub>).

MS: *m/z* (relative intensity) 197 (M<sup>+</sup>,8), 106 (100).

### ***N*-Cyclohexylaniline**

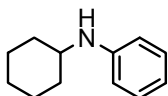

<sup>1</sup>H NMR ( CDCl<sub>3</sub> ):  $\delta$  7.20 – 7.09 (m, 2H, aromatic) ,  $\delta$  6.67 – 6.55 (m, 3H, aromatic) ,  $\delta$  3.49 (br, 1H, NH) ,  $\delta$  3.27 – 3.18 (m, 1H, CH) ,  $\delta$  2.06 – 2.01 (m, 2H, CH<sub>2</sub>) ,  $\delta$  1.77 – 1.62 (m, 3H, CH<sub>2</sub>) ,  $\delta$  1.42 – 1.05 (m, 5H, CH<sub>2</sub>).

MS: *m/z* (relative intensity) 175 (M<sup>+</sup>,28), 132 (100).

### ***N*-Octylaniline**

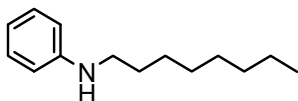

<sup>1</sup>H NMR ( CDCl<sub>3</sub> ):  $\delta$  7.19 – 7.09 (m, 2H, aromatic) ,  $\delta$  6.65 – 6.56 (m, 3H, aromatic) ,  $\delta$  3.52 (br, 1H, NH) ,  $\delta$  3.03 (t, J=7Hz, 2H, CH<sub>2</sub>) ,  $\delta$  1.57 – 1.52 (m, 2H, CH<sub>2</sub>) ,  $\delta$  1.27 (br, 10H, CH<sub>2</sub>) ,  $\delta$  0.82 (t, J=7Hz, 3H, CH<sub>3</sub>).

MS: *m/z* (relative intensity) 205 (M<sup>+</sup>,16), 106 (100).

### ***N*-Hexyl(1-methylheptyl)amine**

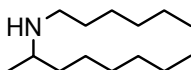

<sup>1</sup>H NMR ( CDCl<sub>3</sub> ):  $\delta$  2.34 – 2.28 (m, 3H, CH<sub>2</sub>) ,  $\delta$  1.50 – 1.36 (m, 3H, CH<sub>2</sub>, NH) ,  $\delta$  1.26 – 1.21 (m, 16H, CH<sub>2</sub>) ,  $\delta$  1.00 (d, J=6.2Hz, 3H, CH<sub>3</sub>) ,  $\delta$  0.83 – 0.79 (m, 6H, CH<sub>3</sub>).

MS: *m/z* (relative intensity) 213 (M<sup>+</sup>,3), 128 (100).

### ***N*-Isopropylaniline**

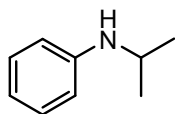

$^1\text{H NMR}$  (  $\text{CDCl}_3$  ):  $\delta$  7.35 – 7.31 (m, 2H, aromatic) ,  $\delta$  6.91 – 6.84 (m, 1H, aromatic) ,  $\delta$  6.80 – 6.77 (m, 2H, aromatic) ,  $\delta$  3.83 – 3.75 (m, 1H, CH) ,  $\delta$  3.95 (br, 1H, NH).

MS:  $m/z$  (relative intensity) 135 ( $\text{M}^+$ ,25), 120 (100).

### ***N*-(4-Methylbenzyl)aniline**

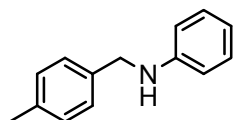

$^1\text{H NMR}$  (  $\text{CDCl}_3$  ):  $\delta$  7.26 – 7.12 (m, 6H, aromatic) ,  $\delta$  6.73 – 6.60 (m, 3H, aromatic) ,  $\delta$  4.26 (s, 2H,  $\text{CH}_2$ ) ,  $\delta$  3.95 (br, 1H, NH) ,  $\delta$  2.33 (s, 3H,  $\text{CH}_3$ ).

MS:  $m/z$  (relative intensity) 197 ( $\text{M}^+$ ,39), 105 (100).

### ***N*-(4-Methoxybenzyl)aniline**

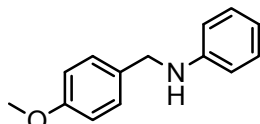

$^1\text{H NMR}$  (  $\text{CDCl}_3$  ):  $\delta$  7.25 – 7.10 (m, 4H, aromatic) ,  $\delta$  6.85 – 6.56 (m, 5H, aromatic) ,  $\delta$  4.19 (s, 2H) ,  $\delta$  3.88 (br, 1H, NH) ,  $\delta$  3.74 (s, 3H,  $\text{OCH}_3$ ).

MS:  $m/z$  (relative intensity) 213 ( $\text{M}^+$ ,14), 121 (100).

### ***N*-Benzylaniline**

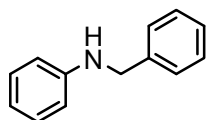

$^1\text{H NMR}$  (  $\text{CDCl}_3$  ):  $\delta$  7.37 – 7.24 (m, 5H, aromatic) ,  $\delta$  7.16 (t,  $J=8.4\text{Hz}$ , 2H, aromatic) ,  $\delta$  6.70 (t,  $J=7.2\text{Hz}$ , 1H, aromatic) ,  $\delta$  6.63 (d,  $J=5.9\text{Hz}$ , 2H, aromatic) ,  $\delta$  4.32 (s, 2H,  $\text{CH}_2$ ) ,  $\delta$  4.01 (br, 1H, NH).

MS:  $m/z$  (relative intensity) 183 ( $\text{M}^+$ ,53), 91 (100).

### ***N*-Benzyl-4-fluoroaniline**

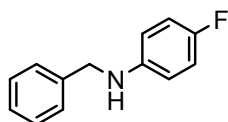

$^1\text{H NMR}$  (  $\text{CDCl}_3$  ):  $\delta$  7.34 – 7.17 (m, 5H, aromatic) ,  $\delta$  6.72 (d,  $J=9\text{Hz}$ , 2H, aromatic) ,  $\delta$  6.63 (d,  $J=9\text{Hz}$ , 2H, aromatic) ,  $\delta$  4.30 (s, 2H,  $\text{CH}_2$ ) ,  $\delta$  4.01 (br, 1H, NH).

MS:  $m/z$  (relative intensity) 201 ( $\text{M}^+$ ,34), 109 (100).

### **Benzyl-*o*-tolyl-amine**

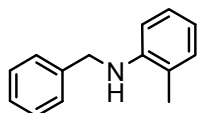

$^1\text{H NMR}$  (  $\text{CDCl}_3$  ):  $\delta$  7.40 – 7.30 (m, 5H, aromatic) ,  $\delta$  7.14 – 7.08 (m, 2H, aromatic) ,  $\delta$  6.68 (t,  $J=7.6\text{Hz}$ , 1H, aromatic) ,  $\delta$  6.62 (d,  $J=8.4\text{Hz}$ , 1H, aromatic) ,  $\delta$  4.38 (s, 2H,  $\text{CH}_2$ ) ,  $\delta$  3.86 (br, 1H, NH) ,  $\delta$  2.17 (s, 3H,  $\text{CH}_3$ ).

MS:  $m/z$  (relative intensity) 197 ( $\text{M}^+$ ,40), 91 (100).

### ***N*-Isopropylaniline**

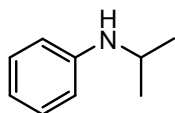

$^1\text{H NMR}$  (  $\text{CDCl}_3$  ):  $\delta$  7.35 – 7.31 (m, 2H, aromatic) ,  $\delta$  6.91 – 6.84 (m, 1H, aromatic) ,  $\delta$  6.80 – 6.77 (m, 2H, aromatic) ,  $\delta$  3.83 – 3.75 (m, 1H, CH) ,  $\delta$  3.95 (br, 1H, NH).

MS:  $m/z$  (relative intensity) 135 ( $\text{M}^+$ ,25), 120 (100).
